# Supplementary material
Source: publisher site journal article supplement (https://www.dovepress.com/article/280032)
Supplement: Supplementary file 1 [file get_supplementary_file.php]

**Supplementary Data**

**Use of the HSAK during the educational intervention:**

1. Before the first use, clip the syringe and vacuum the air in the knee. Prepare the liquid by diluting red Alimentary tracing dye (8 mL) with water (52 mL) in one vial.
2. Ask the patient to touch the knee.
3. Inject the knee without the patient seeing the fluid until the patient feels that the knee is swollen. Approximately two 30 mL syringes of fluid should be injected.
4. Remove the first shell (skin) by opening the zipper under the knee, then remove the muscles.
5. Get the patient to see the consequence of bleeding inside the joint (look well under the knee).
6. Put back the muscles and skin and inject 30 mL of water (representing factor concentrate) into the second pouch. Explain to the patient that treatment with factor concentrate is administered to stop the bleeding.
7. While still hiding the fluid, aspirate it, and ask the patient to say when the knee feels normal. This represents a lack of swelling, pain, or discomfort.
8. When the patient considers that the knee has returned to normal, remove the two shells. There will still be a small amount of blood in the knee. Explain to the patient that while a small amount of blood remains in the absence of swelling and pain, this may damage the joint and is the reason why the prophylactic treatment must be followed to avoid arthropathy.

**Questionnaire and scoring methods on disease knowledge at D0 before and just after the use of the HSAK and at M6**

Question 1: Can you name your disease precisely?

- 0 = Don’t know / false answer
- 1 = 1/3 among Name/Type/Severity
- 2 = 2/3 among Name/Type/Severity
- 3 = 3/3 among Name/Type/Severity

Question 2: Which factor of the coagulation is missing?

- If « 8 » or « VIII » or « EIGHT » or « 9 » or « IX » or « NINE » = 1
- If none of these terms = 0

Question 3a: Can you give a definition of Hemarthrosis?

- « Yes »: 1 point
- « No »: 0 point

Question 3b: If yes which one?

- « Bleeding » / « Blood » and « Joint »: 2 points
- « Bleeding » / « Blood » or « Joint »: 1 point
- None of « Bleeding » / « Blood » / « Joint »: 0 point

if « Yes » at Q3a and false definition: -1 point on global score (Q 3a + 3b)

if « No » at Q2a but good definition: no penalty

The global score ranges from 0 to 7.

**Questionnaire and scoring methods on treatment knowledge at D0 before and just after the use of the HSAK and at M6**

Question 1: In case of a bleed in a joint, should you treat immediately?

- « Yes »: 1 point
- « No »: 0 point

Question 2: After pain relief and disappearance of swelling, could prolonging treatment be useful?

- « Yes »: 1 point
- « No »: 0 point

Question 3: « Pain in a joint is always an hemarthrosis? »

- « No »: 1 point
- « Yes »: 0 point

Question 4: Which treatments for hemarthrosis do you know? The patient can give up to 4 treatments. The score will be calculated as the number of correct answers divided by the number of treatments prescribed in the center. The score for Q3 will be between 0 and 1.

The global score ranges from 0 to 4.
